# Supplementary material for: A recessive PRDM13 mutation results in congenital hypogonadotropic hypogonadism and cerebellar hypoplasia
Source: PubMed Central journal article supplement (PMC8670848; doi:10.1172/jci141587), 2021-12-15
Supplement: jci-131-141587-s152.pdf [file jci-131-141587-s152.pdf]

**Supplemental information**

**Supplemental Table 1: Summary of patient phenotypes**

| Patient | Age at Testing (years) | Karyotype | Birth weight Kg (SDS) | GnRH test (IU/L) | Time (mins) |     |     | hCG test: Serum Free Testosterone (nmol/L)                                          | Scan: MRI or CT                                    | Other features (age in years)                                                                                                                                                                                                                        | Treatment (age started in years)          |
|---------|------------------------|-----------|-----------------------|------------------|-------------|-----|-----|-------------------------------------------------------------------------------------|----------------------------------------------------|------------------------------------------------------------------------------------------------------------------------------------------------------------------------------------------------------------------------------------------------------|-------------------------------------------|
|         |                        |           |                       |                  | 0           | +20 | +60 |                                                                                     |                                                    |                                                                                                                                                                                                                                                      |                                           |
| 1       | 14.3                   | XY        | 2.8 (-1.85)           | LH               | 0.1         | 2.3 | 2.3 | Baseline: 2.3<br>After 3 day hCG (day 4): 2.2                                       | CT: cerebellar hypoplasia - hemispheres and vermis | Delayed motor development (1) BL orchidopexy (3), Repeated left-side (6) Right-sided thoracic progressive scoliosis (1.5): 2-stage surgical fixation of the spine (10) Hypotonia Symmetrical hypo-reflexia Ataxic gait Moderate intellectual deficit | Testosterone (14.5)                       |
|         |                        |           |                       | FSH              | 0.2         | 2.6 | 4.4 |                                                                                     |                                                    |                                                                                                                                                                                                                                                      |                                           |
| 2       | 12.5                   | XX        | 3.4 (-0.11)           | LH               | <0.1        | 2.4 | 2.6 | N/A                                                                                 | MRI: Normal                                        | Generalised hypotonia Hyporeflexia Delayed gross motor development Right-sided thoraco-lumbar progressive scoliosis (2): surgical fixation of the spine (16) Moderate intellectual deficit                                                           | Ethinylestradiol (13) Norethisterone (15) |
|         |                        |           |                       | FSH              | 0.8         | 3.1 | 6.4 |                                                                                     |                                                    |                                                                                                                                                                                                                                                      |                                           |
| 3       | 13                     | XY        | 2.95 (-1.47)          | LH               | <0.1        | 1.0 | 0.9 | Baseline: <0.69<br>After 3 day hCG (day 4): 2.2<br>After 3 weeks hCG (day 20): 30.7 | CT: cerebellar hypoplasia                          | Global developmental delay Generalised hypertonia and hyper-reflexia (0.25) Strabismus Scoliosis: corrective surgery (11) Wheelchair-dependent (12) BL orchidopexy (14) Severe intellectual deficit Epilepsy (16)                                    | Testosterone (13.5) Lamotrigine (16)      |
|         |                        |           |                       | FSH              | 0.4         | 1.7 | 3.1 |                                                                                     |                                                    |                                                                                                                                                                                                                                                      |                                           |

## **Patients clinical data:**

### **Pedigree I**

Patient 1 (VI.3) is a Maltese patient born to a consanguineous union with a birth weight of 2.8 kg (-1.85 SDS). He was diagnosed with delayed motor development at 1 year of age, and noted to have a right-sided thoracic scoliosis from 18 months age. Neurological examination at 3 years revealed hypotonia, symmetrical hypo-reflexia, and an ataxic gait. He had bilateral undescended testes and underwent bilateral orchidopexy, which was repeated on the left at 6 years of age. MRI of the brain revealed hypoplasia of the cerebellar hemispheres and vermis (Figure 1B). Progression of scoliosis necessitated a 2-stage surgical fixation of the spine at the age of 10 years. He was referred to the Paediatric Endocrine Clinic at 14.3 years with delayed puberty. Pubertal staging at this age was G1 P1 A1 -/03 mL, and his height was 136 cm (-3.22 SDS). He had a healthy 18 year old sister (VI.2), and a 2 year old sister with neurological problems who was eventually diagnosed to have HH (Patient VI.4). A gonadotropin-releasing hormone (GnRH) test revealed a peak LH of 2.3 IU/L, with an FSH of 4.4 IU/L. A 3-day hCG test revealed no change in the testosterone concentration after 3 hCG injections (peak testosterone of 2.2 nmol/L), and was therefore suboptimal and consistent with hypogonadotropic hypogonadism (Segal TY et al J Clin Endocrinol Metab. 2009 Mar;94(3):780-5). All other pituitary function tests (including thyroid function tests) were normal. Treatment with exogenous intramuscular testosterone (testosterone esters) was commenced at 14.5 years of age with a gradual increase in dosage over 2 years. Treatment was switched to a transdermal patch preparation at 17 years of age, and to long-acting testosterone undecanoate, by intramuscular injection every 3 months, at 22 years. He is now 30 years old with moderate intellectual deficit, and remains on testosterone replacement therapy.

Patient 2 (VI.4), the sister of Patient 1, had a birth weight of 3.4 kg (-0.11 SDS). At postnatal follow-up, she was noted to have generalised hypotonia and hyporeflexia, as well as delayed gross motor development. A progressive right-sided thoraco-lumbar scoliosis was first noted at the age of 2 years. All neurological investigations, including metabolic screen, EMG, and brain MRI were reported as normal. She was first seen in the Paediatric Endocrinology Clinic at the age of 11.3 years, with a similar neurological condition to her elder brother (Patient 1). She had not entered spontaneous puberty by the age of 12.5 years, with low basal gonadotrophins (basal LH <0.1 U/L, FSH 0.8 IU/L), and with a peak LH of 2.6 IU/L and an FSH of 6.4 IU/L on GnRH testing.

All other pituitary function tests (including thyroid function and serum prolactin) were normal. At 13 years of age, when her pubertal staging remained at Tanner B1, she was started on oral ethinyloestradiol to induce pubertal development. The dose of ethinyloestradiol was increased gradually over the subsequent 2 years, which resulted in normal breast development (Tanner B4 by 15 years of age). Oral norethisterone was introduced at the age of 15 years in order to induce regular menstrual periods. Surgical fixation of the spine was recently performed at 16 years of age. She is now 16.5 years old with moderate intellectual deficit, and remains on oral ethinyloestradiol and norethisterone.

## **Pedigree II**

Patient 3 was born to healthy, non-consanguineous Maltese parents, with a birth weight of 2.95 kg (-1.47 SDS). The pregnancy was complicated by hyperemesis gravidarum and polyhydramnios, with reported intrauterine growth restriction. Global developmental delay, generalised hypertonia and hyper-reflexia were first noted at 3 months of age. He also had bilateral epicanthic folds and downturned angles of the mouth. A CT brain scan revealed cerebellar hypoplasia. Initially, he was able to walk with a very broad-based gait using a walking frame with significant support. He needed corrective surgery for strabismus as well as spinal surgery for progressive scoliosis at 11 years of age, but became completely wheelchair-dependent by the age of 12 years. He was referred to the Paediatric Endocrine Clinic at the age of 11.4 years with a micropenis. On pubertal staging at this age, his stretched penile length was 4 cm (less than P10) and both testes were impalpable. Basal gonadotrophins were low (LH <0.1 IU/L, FSH 0.4 IU/L). A GnRH test performed at the age of 13 years revealed a peak LH of 0.9 IU/L with an FSH of 3.1 IU/L. The peak testosterone was sub-optimal at 2.3 nmol/L after a 3 day hCG test, with an excellent peak of 30.7 nmol/L after 3 weeks of HCG. Following these tests, the left testis descended into the scrotum (2 mL volume), but the right testis remained impalpable. Exogenous testosterone (testosterone enantate) was commenced at low dose by intramuscular injection at 13.5 years of age, and the dose increased gradually over the following 2 years. Bilateral orchidopexies were performed at 14 years of age. Over time, he experienced penile growth, but both testes remained 2 mL in volume. He is currently 21 years old with severe intellectual deficit, and continues to receive exogenous testosterone replacement therapy. He also began treatment with oral lamotrigine for epilepsy at the age of 16 years. He has a healthy brother who is 2 years older, and who had gone through puberty spontaneously at 12 – 13 years of age.

**Supplemental Table 2: Neurological phenotype of affected patients**

| <b>Information</b>       |                    | <b>Patient 1 (VI.3)</b>                                 | <b>Patient 2 (VI.4)</b>                                 | <b>Patient 3 (Pedigree 2)</b>                                     |
|--------------------------|--------------------|---------------------------------------------------------|---------------------------------------------------------|-------------------------------------------------------------------|
| Neurological information | Tone               | Generalised hypotonia                                   | Generalised hypotonia                                   | Generalised hypotonia                                             |
|                          | Power              | Reduced                                                 | Very reduced                                            | Extremely reduced                                                 |
|                          | Reflexes           | Symmetrical hyporeflexia<br>Down-going plantar reflexes | Symmetrical hyporeflexia<br>Down-going plantar reflexes | Symmetrical hyporeflexia<br>Down-going plantar reflexes           |
|                          | Gait               | Broad-based, but able to ambulate by using a frame      | Broad-based, but able to ambulate by using a frame      | Initially very broad-based, later completely wheelchair-dependent |
|                          | Nystagmus          | Not present                                             | Not present                                             | Present                                                           |
|                          | Intention tremor   | Present                                                 | Present                                                 | Present                                                           |
|                          | Dysdiadochokinesis | Present                                                 | Present                                                 | Present                                                           |
|                          | Past-pointing      | Present                                                 | Present                                                 | Present                                                           |
| Age measured             |                    | 28 years                                                | 17 years                                                | 17 years                                                          |
| Weight                   |                    | 62 kg                                                   | 56 kg                                                   | 36.4 kg                                                           |
| Height                   |                    | 155.4 cm                                                | 144.5 cm                                                | Impossible                                                        |
| BMI                      |                    | 25.6 kg/m <sup>2</sup>                                  | 26.8 kg/m <sup>2</sup>                                  | ?                                                                 |

**Supplemental Table 3: A region on chromosome 6 surrounding the *PRDM13* mutation (c.398-3\_407delCAGGGGAGGAGCG), showing the long-affected only haplotype (chr6:98896667-chr6:100480906=1584239bp/1.6Mb) and the nested-shared haplotype (chr6:100053626-chr6:100265121=211495bp/0.2Mb). Genotype data was generated from Illumina Infinium OmniExpress-48 microarray, all genomic positions correspond to genome build GRCh37/Hg19.**

|            |     |          | Patient 1 | Patient 2 | Patient 3 | Control     |                                           |
|------------|-----|----------|-----------|-----------|-----------|-------------|-------------------------------------------|
| Name       | Chr | Position | Hom       | Hom       | Hom       | Het Carrier |                                           |
| rs3104095  | 6   | 98883438 | AA        | AA        | AB        | BB          |                                           |
| rs1494777  | 6   | 98892120 | AA        | AA        | AB        | AB          |                                           |
| rs3123339  | 6   | 98893182 | BB        | BB        | AB        | AB          |                                           |
| rs3125575  | 6   | 98895069 | AA        | AA        | AB        | AB          |                                           |
| rs9321063  | 6   | 98896667 | AA        | AA        | AA        | AA          | Beginning of long-affected only haplotype |
| rs17761570 | 6   | 98904572 | AB        | AB        | AB        | AB          |                                           |
| rs9388482  | 6   | 98905933 | BB        | BB        | BB        | AB          |                                           |
| rs9491633  | 6   | 98914680 | BB        | BB        | BB        | BB          |                                           |
| rs9491646  | 6   | 98927363 | BB        | BB        | BB        | BB          |                                           |
| rs210400   | 6   | 98931278 | AA        | AA        | AA        | AA          |                                           |
| rs169750   | 6   | 98931716 | BB        | BB        | BB        | BB          |                                           |
| rs9398813  | 6   | 98935310 | BB        | BB        | BB        | BB          |                                           |
| rs9321067  | 6   | 98936578 | BB        | BB        | BB        | BB          |                                           |
| rs17058578 | 6   | 98938023 | BB        | BB        | BB        | BB          |                                           |
| rs9401901  | 6   | 98938237 | AA        | AA        | AA        | AB          |                                           |
| rs9388508  | 6   | 98938249 | BB        | BB        | BB        | BB          |                                           |
| rs2227121  | 6   | 98938834 | AB        | AB        | BB        | AB          |                                           |
| rs158773   | 6   | 98949550 | BB        | BB        | BB        | BB          |                                           |
| rs158774   | 6   | 98953633 | AA        | AA        | AA        | AB          |                                           |
| rs158777   | 6   | 98959605 | AA        | AA        | AA        | AB          |                                           |
| rs150396   | 6   | 98962591 | BB        | BB        | BB        | BB          |                                           |

|            |   |          |    |    |    |    |  |
|------------|---|----------|----|----|----|----|--|
| rs1481449  | 6 | 98971740 | BB | BB | BB | BB |  |
| rs211215   | 6 | 98975810 | AA | AA | AA | AA |  |
| rs11961327 | 6 | 98978496 | BB | BB | BB | BB |  |
| rs211221   | 6 | 98980113 | BB | BB | BB | BB |  |
| rs211222   | 6 | 98980147 | BB | BB | BB | AB |  |
| rs17058667 | 6 | 98991464 | BB | BB | BB | BB |  |
| rs183316   | 6 | 98992369 | BB | BB | BB | BB |  |
| rs211227   | 6 | 99001499 | AA | AA | AA | AA |  |
| rs2046174  | 6 | 99013740 | AA | AA | AA | AA |  |
| rs17829357 | 6 | 99017732 | BB | BB | BB | BB |  |
| rs9491794  | 6 | 99019431 | BB | BB | BB | AB |  |
| rs9401968  | 6 | 99027074 | BB | BB | BB | BB |  |
| rs1481440  | 6 | 99032723 | AA | AA | AA | AB |  |
| rs11752460 | 6 | 99033489 | AA | AA | AA | AA |  |
| rs1481438  | 6 | 99034313 | AA | AA | AA | AB |  |
| rs6929790  | 6 | 99045749 | AA | AA | AA | AB |  |
| rs17830067 | 6 | 99050825 | BB | BB | BB | BB |  |
| rs969540   | 6 | 99058170 | BB | BB | BB | BB |  |
| rs17058737 | 6 | 99076746 | AA | AA | AA | AA |  |
| rs11757142 | 6 | 99080658 | AA | AA | AA | AA |  |
| rs17058761 | 6 | 99092539 | BB | BB | BB | BB |  |
| rs11752997 | 6 | 99124184 | AA | AA | AA | AA |  |
| rs4472356  | 6 | 99126082 | AA | AA | AA | AB |  |
| rs9375573  | 6 | 99126994 | AA | AA | AA | AB |  |
| rs12204275 | 6 | 99138875 | BB | BB | BB | BB |  |
| rs6939572  | 6 | 99139350 | AA | AA | AA | AA |  |
| rs6924761  | 6 | 99140492 | BB | BB | BB | BB |  |
| rs4424090  | 6 | 99147074 | BB | BB | BB | BB |  |
| rs9375604  | 6 | 99170039 | AA | AA | AA | AA |  |
| rs4529305  | 6 | 99173425 | AA | AA | AA | AA |  |
| rs9388676  | 6 | 99175625 | BB | BB | BB | BB |  |

|            |   |          |    |    |    |    |  |
|------------|---|----------|----|----|----|----|--|
| rs11154467 | 6 | 99195548 | BB | BB | BB | AB |  |
| rs4406241  | 6 | 99203222 | BB | BB | BB | BB |  |
| rs7762570  | 6 | 99214884 | AA | AA | AA | AB |  |
| rs4839976  | 6 | 99218958 | AA | AA | AA | AB |  |
| rs4398748  | 6 | 99219522 | AA | AA | AA | AA |  |
| rs9385493  | 6 | 99221669 | AA | AA | AA | AB |  |
| rs10499023 | 6 | 99226729 | AA | AA | AA | AA |  |
| rs4839977  | 6 | 99229574 | BB | BB | BB | AB |  |
| rs4555920  | 6 | 99230880 | BB | BB | BB | AB |  |
| rs3923049  | 6 | 99233448 | AA | AA | AA | AB |  |
| rs9375642  | 6 | 99235909 | AA | AA | AA | AB |  |
| rs9402154  | 6 | 99236649 | BB | BB | BB | AB |  |
| rs9388719  | 6 | 99237315 | BB | BB | BB | AA |  |
| rs12174549 | 6 | 99237479 | AA | AA | AA | AA |  |
| rs7762652  | 6 | 99242592 | BB | BB | BB | AA |  |
| rs9385517  | 6 | 99250916 | BB | BB | BB | BB |  |
| rs4839986  | 6 | 99251754 | BB | BB | BB | AB |  |
| rs6569636  | 6 | 99258445 | AA | AA | AA | BB |  |
| rs9375688  | 6 | 99270438 | BB | BB | BB | AB |  |
| rs9375689  | 6 | 99270533 | BB | BB | BB | AA |  |
| rs2444935  | 6 | 99275290 | BB | BB | BB | BB |  |
| rs1869641  | 6 | 99277867 | AA | AA | AA | BB |  |
| rs1883306  | 6 | 99279449 | AA | AA | AA | AB |  |
| rs3823036  | 6 | 99284532 | AA | AA | AA | AB |  |
| rs195853   | 6 | 99290334 | BB | BB | BB | BB |  |
| rs195852   | 6 | 99290592 | AA | AA | AA | BB |  |
| rs195851   | 6 | 99294322 | BB | BB | BB | AA |  |
| rs174447   | 6 | 99309057 | AA | AA | AA | BB |  |
| rs9388789  | 6 | 99320715 | BB | BB | BB | AB |  |
| rs11537982 | 6 | 99323424 | BB | BB | BB | BB |  |
| rs9375728  | 6 | 99326490 | AA | AA | AA | AB |  |

|            |   |          |    |    |    |    |  |
|------------|---|----------|----|----|----|----|--|
| rs195831   | 6 | 99328730 | AA | AA | AA | AA |  |
| rs10484609 | 6 | 99336279 | AA | AA | AA | AB |  |
| rs7739884  | 6 | 99346145 | BB | BB | BB | AB |  |
| rs195824   | 6 | 99351047 | AA | AA | AA | AB |  |
| rs1011676  | 6 | 99374400 | BB | BB | BB | BB |  |
| rs17058986 | 6 | 99431200 | AA | AA | AA | AA |  |
| rs196959   | 6 | 99432747 | BB | BB | BB | BB |  |
| rs196960   | 6 | 99433614 | BB | BB | BB | AA |  |
| rs2747734  | 6 | 99437566 | BB | BB | BB | AA |  |
| rs2572109  | 6 | 99440369 | BB | BB | BB | AB |  |
| rs12200990 | 6 | 99441083 | BB | BB | BB | AB |  |
| rs2180046  | 6 | 99450081 | BB | BB | BB | BB |  |
| rs2747739  | 6 | 99462075 | BB | BB | BB | AB |  |
| rs9402354  | 6 | 99462324 | AA | AA | AA | AA |  |
| rs9375844  | 6 | 99463771 | BB | BB | BB | BB |  |
| rs2207446  | 6 | 99464542 | AA | AA | AA | BB |  |
| rs12173555 | 6 | 99467661 | BB | BB | BB | AB |  |
| rs9388950  | 6 | 99468942 | AA | AA | AA | BB |  |
| rs2092772  | 6 | 99473410 | BB | BB | BB | AB |  |
| rs12201236 | 6 | 99478174 | BB | BB | BB | AB |  |
| rs4839737  | 6 | 99478304 | AA | AA | AA | BB |  |
| rs2747748  | 6 | 99479842 | AA | AA | AA | AA |  |
| rs7756447  | 6 | 99480633 | BB | BB | BB | BB |  |
| rs11756151 | 6 | 99485266 | BB | BB | BB | BB |  |
| rs1997937  | 6 | 99487230 | BB | BB | BB | AB |  |
| rs12173832 | 6 | 99498599 | BB | BB | BB | BB |  |
| rs2144241  | 6 | 99500963 | AA | AA | AA | AA |  |
| rs6916751  | 6 | 99501709 | AA | AA | AA | AA |  |
| rs9493282  | 6 | 99504377 | BB | BB | BB | BB |  |
| rs12660289 | 6 | 99515134 | AA | AA | AA | AB |  |
| rs2207445  | 6 | 99521031 | BB | BB | BB | BB |  |

|            |   |          |    |    |    |    |  |
|------------|---|----------|----|----|----|----|--|
| rs7764372  | 6 | 99524062 | BB | BB | BB | BB |  |
| rs9375894  | 6 | 99524281 | AA | AA | AA | AB |  |
| rs12212298 | 6 | 99531172 | AA | AA | AA | AA |  |
| rs9385615  | 6 | 99531774 | BB | BB | BB | AB |  |
| rs2572098  | 6 | 99538132 | AA | AA | AA | AA |  |
| rs9402444  | 6 | 99539153 | BB | BB | BB | AB |  |
| rs6902772  | 6 | 99550464 | BB | BB | BB | AB |  |
| rs6940049  | 6 | 99551169 | AA | AA | AA | AA |  |
| rs3860236  | 6 | 99551765 | BB | BB | BB | AB |  |
| rs10457592 | 6 | 99551970 | BB | BB | BB | BB |  |
| rs12208335 | 6 | 99552868 | AA | AA | AA | AB |  |
| rs6938641  | 6 | 99557664 | AA | AA | AA | AA |  |
| rs9373032  | 6 | 99559165 | BB | BB | BB | AB |  |
| rs1081025  | 6 | 99559773 | AA | AA | AA | AB |  |
| rs12526079 | 6 | 99565215 | BB | BB | BB | BB |  |
| rs7769941  | 6 | 99569709 | AA | AA | AA | AA |  |
| rs2388839  | 6 | 99574363 | BB | BB | BB | AB |  |
| rs12111251 | 6 | 99575661 | BB | BB | BB | BB |  |
| rs4454147  | 6 | 99575874 | BB | BB | BB | BB |  |
| rs2029964  | 6 | 99583773 | AA | AA | AA | AB |  |
| rs728758   | 6 | 99584658 | BB | BB | BB | BB |  |
| rs11154718 | 6 | 99592404 | BB | BB | BB | AB |  |
| rs12190591 | 6 | 99593258 | AA | AA | AA | AA |  |
| rs9321394  | 6 | 99600083 | AA | AA | AA | AB |  |
| rs11754157 | 6 | 99607499 | BB | BB | BB | BB |  |
| rs4839999  | 6 | 99610074 | BB | BB | BB | AB |  |
| rs12206927 | 6 | 99613136 | BB | BB | BB | AA |  |
| rs12110525 | 6 | 99629252 | BB | BB | BB | BB |  |
| rs9373057  | 6 | 99630038 | BB | BB | BB | AB |  |
| rs9399068  | 6 | 99633011 | AA | AA | AA | BB |  |
| rs9375977  | 6 | 99637123 | BB | BB | BB | AA |  |



|            |   |          |    |    |    |    |  |
|------------|---|----------|----|----|----|----|--|
| rs7745052  | 6 | 99640610 | BB | BB | BB | AB |  |
| rs1496971  | 6 | 99641248 | AA | AA | AA | BB |  |
| rs1908804  | 6 | 99646240 | AA | AA | AA | AA |  |
| rs7767885  | 6 | 99659802 | AA | AA | AA | BB |  |
| rs7769752  | 6 | 99662681 | AA | AA | AA | BB |  |
| rs17059246 | 6 | 99662743 | AA | AA | AA | AB |  |
| rs9389116  | 6 | 99664294 | BB | BB | BB | AB |  |
| rs4458696  | 6 | 99665178 | BB | BB | BB | BB |  |
| rs9373072  | 6 | 99669676 | BB | BB | BB | AB |  |
| rs2132683  | 6 | 99672014 | AA | AA | AA | AB |  |
| rs9375997  | 6 | 99673152 | BB | BB | BB | AB |  |
| rs9402556  | 6 | 99673466 | AA | AA | AA | BB |  |
| rs12528619 | 6 | 99675908 | BB | BB | BB | BB |  |
| rs1566116  | 6 | 99678424 | AA | AA | AA | AA |  |
| rs4840017  | 6 | 99679578 | BB | BB | BB | BB |  |
| rs9402564  | 6 | 99679902 | BB | BB | BB | BB |  |
| rs10155713 | 6 | 99683181 | BB | BB | BB | BB |  |
| rs2029965  | 6 | 99683802 | BB | BB | BB | BB |  |
| rs9376014  | 6 | 99690090 | AA | AA | AA | AA |  |
| rs12193060 | 6 | 99690449 | AA | AA | AA | AA |  |
| rs1874538  | 6 | 99694494 | AA | AA | AA | AA |  |
| rs6904604  | 6 | 99695108 | BB | BB | BB | BB |  |
| rs9493928  | 6 | 99711169 | BB | BB | BB | BB |  |
| rs9483707  | 6 | 99717329 | BB | BB | BB | AB |  |
| rs13219146 | 6 | 99717914 | AA | AA | AA | AB |  |
| rs1045728  | 6 | 99721049 | BB | BB | BB | AB |  |
| rs12660321 | 6 | 99727653 | BB | BB | BB | BB |  |
| rs1496979  | 6 | 99728442 | AA | AA | AA | AB |  |
| rs6933093  | 6 | 99729901 | BB | BB | BB | AB |  |
| rs9373105  | 6 | 99733939 | AA | AA | AA | AA |  |
| rs1496980  | 6 | 99734185 | BB | BB | BB | AB |  |

|            |   |          |    |    |    |    |  |
|------------|---|----------|----|----|----|----|--|
| rs12207550 | 6 | 99740492 | BB | BB | BB | BB |  |
| rs221582   | 6 | 99744107 | BB | BB | BB | AB |  |
| rs221578   | 6 | 99747633 | AA | AA | AA | AA |  |
| rs221530   | 6 | 99753499 | AA | AA | AA | AA |  |
| rs6913076  | 6 | 99763266 | BB | BB | BB | BB |  |
| rs182613   | 6 | 99768894 | BB | BB | BB | AB |  |
| rs221527   | 6 | 99771540 | BB | BB | BB | BB |  |
| rs13206094 | 6 | 99772374 | AA | AA | AA | AB |  |
| rs4840031  | 6 | 99773417 | BB | BB | BB | BB |  |
| rs6922449  | 6 | 99776986 | AA | AA | AA | AB |  |
| rs11757364 | 6 | 99781218 | BB | BB | BB | AB |  |
| rs17059400 | 6 | 99782879 | AA | AA | AA | AA |  |
| rs11963108 | 6 | 99793615 | BB | BB | BB | BB |  |
| rs9402701  | 6 | 99801698 | BB | BB | BB | AB |  |
| rs12198238 | 6 | 99803269 | BB | BB | BB | AB |  |
| rs13194648 | 6 | 99804157 | BB | BB | BB | AB |  |
| rs17059457 | 6 | 99806408 | AA | AA | AA | AA |  |
| rs4839747  | 6 | 99814530 | BB | BB | BB | BB |  |
| rs6925344  | 6 | 99819379 | BB | BB | BB | AB |  |
| rs12193590 | 6 | 99826265 | BB | BB | BB | AB |  |
| rs9402716  | 6 | 99827314 | BB | BB | BB | AB |  |
| rs4840038  | 6 | 99828941 | AA | AA | AA | AB |  |
| rs11154812 | 6 | 99836954 | BB | BB | BB | BB |  |
| rs9376137  | 6 | 99842056 | BB | BB | BB | BB |  |
| rs9376138  | 6 | 99842138 | BB | BB | BB | BB |  |
| rs11961608 | 6 | 99847168 | AA | AA | AA | AA |  |
| rs4144165  | 6 | 99847260 | BB | BB | BB | BB |  |
| rs3811072  | 6 | 99851977 | BB | BB | BB | BB |  |
| rs11154824 | 6 | 99852267 | AA | AA | AA | AA |  |
| rs4840039  | 6 | 99869689 | BB | BB | BB | BB |  |
| rs12198321 | 6 | 99871010 | BB | BB | BB | BB |  |

|            |   |           |    |    |    |    |  |
|------------|---|-----------|----|----|----|----|--|
| rs4351270  | 6 | 99873534  | BB | BB | BB | BB |  |
| rs6923983  | 6 | 99877219  | AA | AA | AA | AB |  |
| rs1134718  | 6 | 99880380  | AA | AA | AA | AA |  |
| rs12214037 | 6 | 99880572  | AA | AA | AA | AA |  |
| rs17785525 | 6 | 99882563  | BB | BB | BB | AB |  |
| rs6570064  | 6 | 99883137  | AA | AA | AA | AB |  |
| rs9402791  | 6 | 99883694  | AA | AA | AA | AA |  |
| rs6570065  | 6 | 99883704  | BB | BB | BB | BB |  |
| rs4839748  | 6 | 99889915  | AA | AA | AA | AB |  |
| rs9494471  | 6 | 99893527  | BB | BB | BB | AB |  |
| rs12203426 | 6 | 99893878  | AA | AA | AA | AA |  |
| rs4504482  | 6 | 99893938  | AA | AA | AA | AA |  |
| rs10155760 | 6 | 99901608  | BB | BB | BB | BB |  |
| rs6916603  | 6 | 99905558  | BB | BB | BB | AB |  |
| rs10457650 | 6 | 99916182  | AA | AA | AA | AA |  |
| rs7745012  | 6 | 99921822  | BB | BB | BB | BB |  |
| rs9483935  | 6 | 99933680  | BB | BB | BB | BB |  |
| rs6918880  | 6 | 99934446  | AA | AA | AA | AA |  |
| rs12717185 | 6 | 99939045  | AA | AA | AA | AB |  |
| rs2209157  | 6 | 99964012  | BB | BB | BB | BB |  |
| rs9402863  | 6 | 99971429  | BB | BB | BB | AB |  |
| rs10223892 | 6 | 99973893  | BB | BB | BB | AB |  |
| rs17224695 | 6 | 99974948  | BB | BB | BB | AB |  |
| rs2057517  | 6 | 99980252  | AA | AA | AA | AA |  |
| rs2057518  | 6 | 99980522  | AA | AA | AA | AA |  |
| rs7754710  | 6 | 99986195  | BB | BB | BB | AB |  |
| rs1054227  | 6 | 99990856  | BB | BB | BB | AB |  |
| rs2296154  | 6 | 99993268  | AA | AA | AA | AB |  |
| rs13205324 | 6 | 99995320  | BB | BB | BB | BB |  |
| rs543967   | 6 | 100005775 | BB | BB | BB | AB |  |
| rs1590359  | 6 | 100022125 | BB | BB | BB | BB |  |

|            |          |                  |    |    |    |    |                                      |
|------------|----------|------------------|----|----|----|----|--------------------------------------|
| rs514769   | 6        | 100031037        | AA | AA | AA | AB |                                      |
| rs1552855  | 6        | 100046845        | AA | AA | AA | AB |                                      |
| rs9484083  | 6        | 100046933        | AA | AA | AA | AB |                                      |
| rs7741279  | 6        | 100053626        | BB | BB | BB | BB | Beginning of nested-shared haplotype |
| rs330843   | 6        | 100060761        | BB | BB | BB | BB |                                      |
|            | <b>6</b> | <b>100060906</b> |    |    |    |    | <b>Mutation position</b>             |
| rs3734346  | 6        | 100062766        | AA | AA | AA | AA |                                      |
| rs330844   | 6        | 100063243        | BB | BB | BB | BB |                                      |
| rs6927488  | 6        | 100081441        | BB | BB | BB | BB |                                      |
| rs594231   | 6        | 100082983        | BB | BB | BB | BB |                                      |
| rs9402954  | 6        | 100088902        | AA | AA | AA | AA |                                      |
| rs1339203  | 6        | 100092390        | BB | BB | BB | BB |                                      |
| rs546567   | 6        | 100099703        | BB | BB | BB | BB |                                      |
| rs13193313 | 6        | 100108500        | AA | AA | AA | AA |                                      |
| rs9321659  | 6        | 100116092        | BB | BB | BB | BB |                                      |
| rs650783   | 6        | 100125119        | AA | AA | AA | AA |                                      |
| rs9373217  | 6        | 100129570        | BB | BB | BB | BB |                                      |
| rs503649   | 6        | 100129959        | AA | AA | AA | AA |                                      |
| rs472977   | 6        | 100130991        | BB | BB | BB | BB |                                      |
| rs9495145  | 6        | 100131219        | BB | BB | BB | BB |                                      |
| rs9376355  | 6        | 100132920        | AA | AA | AA | AA |                                      |
| rs12661094 | 6        | 100161035        | BB | BB | BB | BB |                                      |
| rs12211649 | 6        | 100172277        | BB | BB | BB | BB |                                      |
| rs4839755  | 6        | 100173173        | BB | BB | BB | BB |                                      |
| rs9389645  | 6        | 100173832        | AA | AA | AA | AA |                                      |
| rs6916754  | 6        | 100174464        | BB | BB | BB | BB |                                      |
| rs6908196  | 6        | 100185261        | BB | BB | BB | BB |                                      |
| rs12527523 | 6        | 100187748        | BB | BB | BB | BB |                                      |
| rs12525414 | 6        | 100192215        | AA | AA | AA | AA |                                      |
| rs17826560 | 6        | 100195578        | AA | AA | AA | AA |                                      |
| rs7742890  | 6        | 100197285        | AA | AA | AA | NC |                                      |

|            |   |           |    |    |    |    |                                |
|------------|---|-----------|----|----|----|----|--------------------------------|
| rs7356874  | 6 | 100197712 | BB | BB | BB | BB |                                |
| rs10485226 | 6 | 100206681 | AA | AA | AA | AA |                                |
| rs10485227 | 6 | 100207327 | BB | BB | BB | BB |                                |
| rs4388294  | 6 | 100207838 | AA | AA | AA | AA |                                |
| rs17059765 | 6 | 100208624 | AA | AA | AA | AA |                                |
| rs4431442  | 6 | 100213515 | BB | BB | BB | BB |                                |
| rs9403091  | 6 | 100228256 | BB | BB | BB | AB |                                |
| rs9376435  | 6 | 100231618 | BB | BB | BB | BB |                                |
| rs9385869  | 6 | 100233278 | AA | AA | AA | AA |                                |
| rs9399284  | 6 | 100233870 | AA | AA | AA | AA |                                |
| rs12663112 | 6 | 100236473 | AA | AA | AA | AA |                                |
| rs4596491  | 6 | 100236866 | BB | BB | BB | BB |                                |
| rs12198721 | 6 | 100237464 | AA | AA | AA | AA |                                |
| rs6936455  | 6 | 100237880 | BB | BB | BB | BB |                                |
| rs9403103  | 6 | 100240267 | BB | BB | BB | BB |                                |
| rs6929006  | 6 | 100242158 | BB | BB | BB | BB |                                |
| rs6929428  | 6 | 100242366 | BB | BB | BB | BB |                                |
| rs17236659 | 6 | 100243033 | AA | AA | AA | AA |                                |
| rs9376456  | 6 | 100243997 | BB | BB | BB | BB |                                |
| rs6931227  | 6 | 100247048 | AA | AA | AA | AA |                                |
| rs7763983  | 6 | 100249106 | BB | BB | BB | BB |                                |
| rs17059858 | 6 | 100250740 | AA | AA | AA | AA |                                |
| rs9484314  | 6 | 100251499 | AA | AA | AA | AA |                                |
| rs17059867 | 6 | 100252886 | BB | BB | BB | BB |                                |
| rs9373250  | 6 | 100255471 | BB | BB | BB | BB |                                |
| rs12216503 | 6 | 100257066 | BB | BB | BB | BB |                                |
| rs4495279  | 6 | 100257668 | BB | BB | BB | BB |                                |
| rs6934621  | 6 | 100265121 | BB | BB | BB | BB | End of nested-shared haplotype |
| rs7760502  | 6 | 100266123 | AA | AA | AA | AB |                                |
| rs17059881 | 6 | 100268849 | AA | AA | AA | AA |                                |
| rs13204333 | 6 | 100277840 | BB | BB | BB | AB |                                |

|            |   |           |    |    |    |    |  |
|------------|---|-----------|----|----|----|----|--|
| rs9403141  | 6 | 100279956 | BB | BB | BB | BB |  |
| rs9385894  | 6 | 100280032 | BB | BB | BB | BB |  |
| rs7453413  | 6 | 100281817 | AA | AA | AA | AB |  |
| rs3922542  | 6 | 100282075 | BB | BB | BB | AB |  |
| rs9321763  | 6 | 100286127 | BB | BB | BB | BB |  |
| rs4370372  | 6 | 100288317 | AA | AA | AA | AA |  |
| rs9389752  | 6 | 100289337 | BB | BB | BB | BB |  |
| rs9495653  | 6 | 100292091 | AA | AA | AA | AA |  |
| rs9495657  | 6 | 100293531 | AA | AA | AA | AA |  |
| rs4990843  | 6 | 100296024 | BB | BB | BB | BB |  |
| rs9403163  | 6 | 100297481 | AA | AA | AA | AA |  |
| rs12197810 | 6 | 100317146 | AA | AA | AA | AA |  |
| rs9403180  | 6 | 100319031 | AA | AA | AA | AA |  |
| rs2397663  | 6 | 100321669 | AA | AA | AA | AA |  |
| rs2397664  | 6 | 100321734 | AA | AA | AA | AA |  |
| rs9403186  | 6 | 100324464 | AA | AA | AA | AA |  |
| rs9495745  | 6 | 100326214 | BB | BB | BB | BB |  |
| rs4840097  | 6 | 100328198 | BB | BB | BB | AB |  |
| rs9389810  | 6 | 100329446 | AA | AA | AA | AB |  |
| rs2397678  | 6 | 100345238 | AA | AA | AA | AB |  |
| rs6902801  | 6 | 100345403 | AA | AA | AA | AA |  |
| rs7751620  | 6 | 100353268 | AA | AA | AA | AB |  |
| rs9403208  | 6 | 100354935 | BB | BB | BB | BB |  |
| rs4560657  | 6 | 100366635 | AA | AA | AA | AB |  |
| rs13206575 | 6 | 100369284 | BB | BB | BB | AB |  |
| rs4559096  | 6 | 100391872 | BB | BB | BB | AB |  |
| rs12215494 | 6 | 100392532 | BB | BB | BB | AB |  |
| rs13195863 | 6 | 100393761 | AA | AA | AA | AB |  |
| rs10499026 | 6 | 100397526 | AA | AA | AA | AB |  |
| rs4840106  | 6 | 100403514 | BB | BB | BB | BB |  |
| rs7758072  | 6 | 100411417 | BB | BB | BB | BB |  |

|            |   |           |    |    |    |    |                                     |
|------------|---|-----------|----|----|----|----|-------------------------------------|
| rs7739904  | 6 | 100427015 | BB | BB | BB | BB |                                     |
| rs9496070  | 6 | 100428029 | BB | BB | BB | BB |                                     |
| rs13212643 | 6 | 100428313 | AA | AA | AA | AA |                                     |
| rs12203515 | 6 | 100430062 | BB | BB | BB | BB |                                     |
| rs9496085  | 6 | 100430803 | BB | BB | BB | BB |                                     |
| rs9389934  | 6 | 100431321 | AA | AA | AA | AA |                                     |
| rs2001456  | 6 | 100439009 | BB | BB | BB | AB |                                     |
| rs6925272  | 6 | 100442268 | BB | BB | BB | AB |                                     |
| rs9969034  | 6 | 100442554 | BB | BB | BB | BB |                                     |
| rs2397694  | 6 | 100445429 | AA | AA | AA | AA |                                     |
| rs9399386  | 6 | 100446900 | BB | BB | BB | AB |                                     |
| rs3763374  | 6 | 100448788 | BB | BB | BB | BB |                                     |
| rs9385975  | 6 | 100449301 | BB | BB | BB | BB |                                     |
| rs9389951  | 6 | 100457411 | BB | BB | BB | AB |                                     |
| rs9484578  | 6 | 100469529 | AA | AA | AA | AA |                                     |
| rs4240585  | 6 | 100480906 | BB | BB | BB | AB | End of long-affected only haplotype |
| rs6925134  | 6 | 100482016 | AB | AB | BB | BB |                                     |
| rs12202476 | 6 | 100492824 | BB | BB | BB | BB |                                     |
| rs3890820  | 6 | 100494186 | BB | BB | BB | BB |                                     |
| rs6903499  | 6 | 100510685 | BB | BB | BB | BB |                                     |
| rs11155243 | 6 | 100514432 | BB | BB | BB | BB |                                     |
| rs6938191  | 6 | 100521649 | AB | AB | BB | AB |                                     |

**Primer sequences:**

qPCR primer sequences:

| <b>Gene</b>            | <b>Forward Primer</b> | <b>Reverse Primer</b>   |
|------------------------|-----------------------|-------------------------|
| <i>Prdm13 exon 2-3</i> | GGATAGGGTTAATCCGGGCA  | TGGAGTCGCAGTTGTAGGGA    |
| <i>Prdm13 exon 4</i>   | GAGATCGCCATGCACACACAG | AGTACAGCTTGCCACAGTAGAG  |
| <i>Kiss1</i>           | ATGATCTCAATGGCTTCTTGG | CCAGGCATTAACGAGTTCCT    |
| <i>Npvf</i>            | CAAGACACCCGCTGATTGTC  | TCCTCTCCTCGTTTCGCTTTC   |
| <i>Pomc</i>            | TGGGCGAGCTGATGACCT    | GCCGACTGTGAAATCTGAAAGG  |
| <i>Agrp</i>            | CTTTGGCGGAGGTGCTAGAT  | AGGACTCGTGCAGCCTTACAC   |
| <i>Npy</i>             | TGGCCAGATACTACTCCGCT  | TCCTCTCCTCGTTTCGCTTTC   |
| <i>Gad1</i>            | CTTCTTCAGGCTCTCCCGTG  | CAGGAACAGGCTCGGTTTCAG   |
| <i>Gapdh</i>           | AGGTCGGTGTGAACGGATTTG | TGTAGACCATGTAGTTGAGGTCA |

RT-PCR primer sequences:

| <b>Gene</b>   | <b>Forward Primer</b>    | <b>Reverse Primer</b>    |
|---------------|--------------------------|--------------------------|
| <i>Prdm13</i> | GCCACTTGTGCCTCTACTGT     | CCTCCACAGACAAGAGCGTT     |
| <i>Gapdh</i>  | TGGCATTGTGGAAGGGCTCATGAC | ATGCCAGTGAGCTTCCCGTTCAGC |

Genotyping primer sequences:

| <b>Gene</b>        | <b>Forward Primer</b>      | <b>Reverse Primer</b>     |
|--------------------|----------------------------|---------------------------|
| <b>Prdm13 - KO</b> | CACCTCAGTCTTTGCCTTCCTTGCAA | CTACAACGCGACTCCAACGCATGAT |
| <b>Prdm13 - WT</b> | CACCTCAGTCTTTGCCTTCCTTGCAA | CAGAGAAAGAGTACCCTTGTGCCT  |



Supplemental Figures:

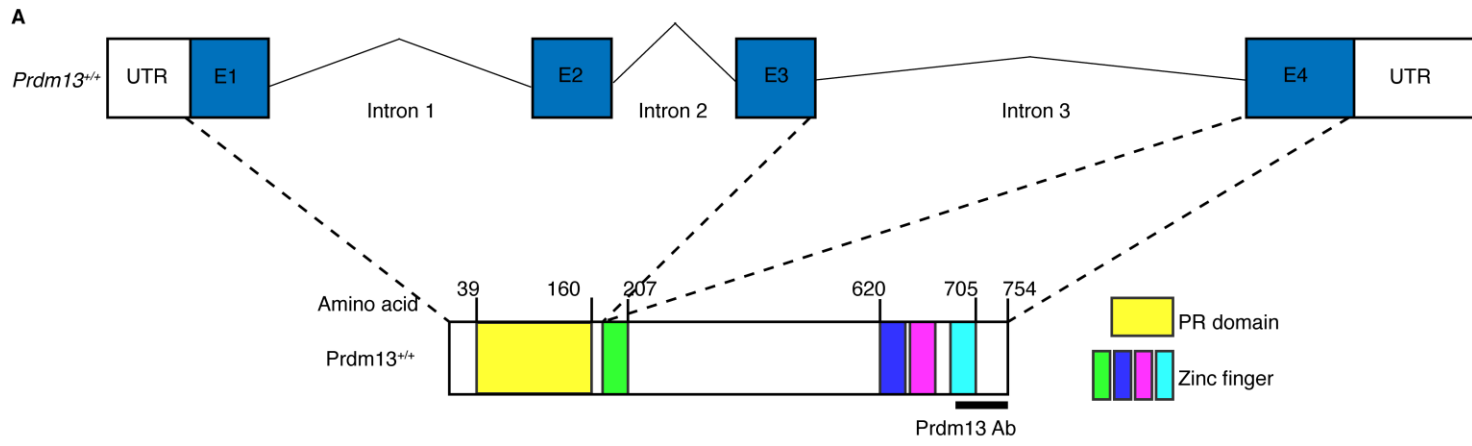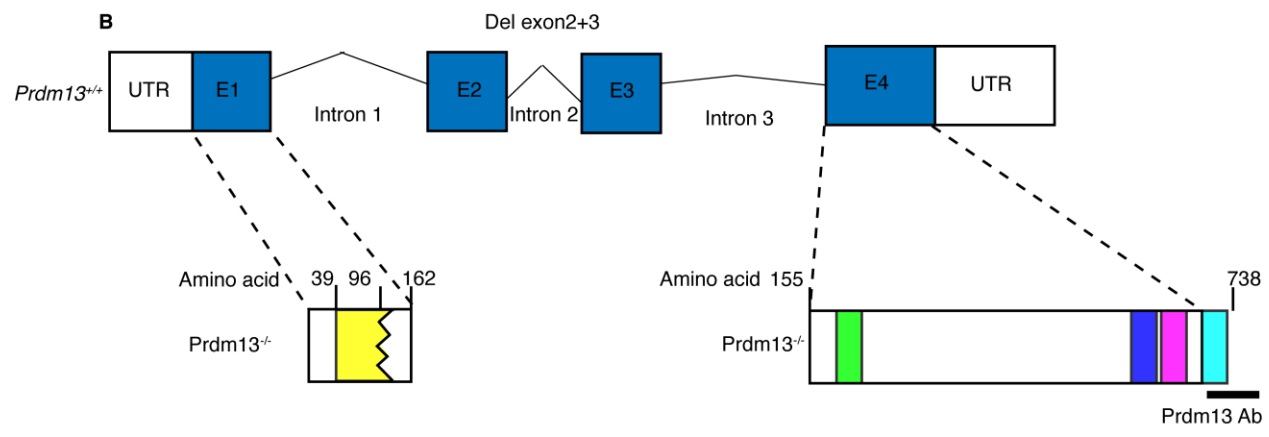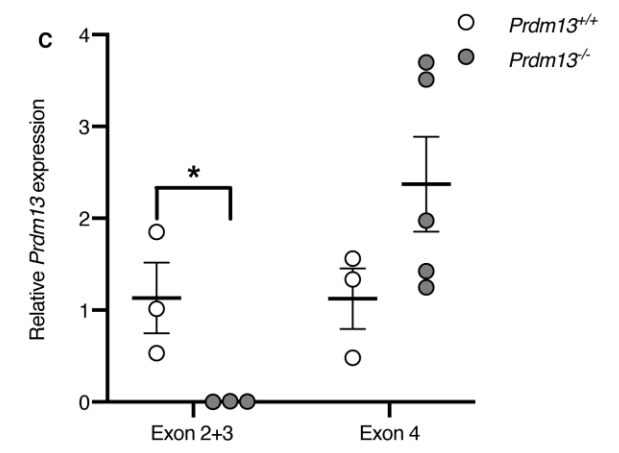

**Supplemental Figure 1. *Prdm13* <sup>$\Delta$ ex2,3/ $\Delta$ ex2,3</sup> mutant allele.** (A) Schematic representation of the mouse *Prdm13* locus and protein. The untranslated regions (UTR) are labelled. Exons are indicated by blue boxes and labelled E1, E2, E3 and E4. The functional domains encoded by the exons are shown and labelled according to the key provided. Dashed lines indicate the regions of the protein encoded by exon 1-3 and exon 4. (B) Schematic representation of the mouse *Prdm13* locus and the predicted *Prdm13*<sup>-/-</sup> protein. Predicted translated proteins are indicated and the C-terminal epitope of antiserum used to identify the wild-type protein is shown. (C) Quantification of *Prdm13* exon 2+3 and exon 4 transcript levels in E12.5 cerebella. Note the significant reduction in exon 2+3 expression in *Prdm13* mutants whilst exon 4 transcripts were increased but did not reach significance. \*P<0.05, \*\*P<0.01, two-tailed unpaired Student's *t* test. E1 = exon1, E2 = exon2, E3 = exon3, E4 = exon4, UTR = untranslated region.

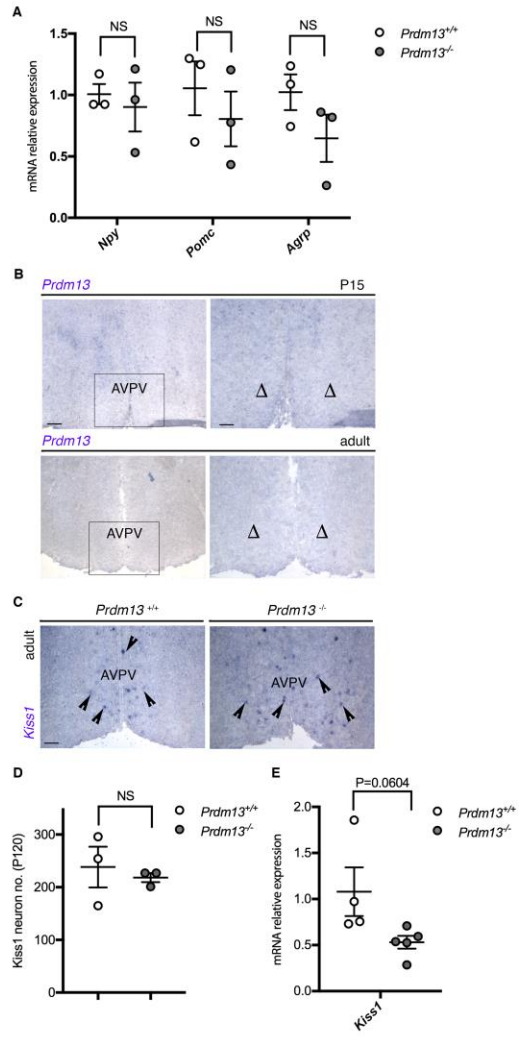

**Supplemental Figure 2. *Prdm13*-null mice display similar levels of Arc GABAergic neuronal markers and a similar number of AVPV Kiss1 neurons compared to wild-type mice.**

**(A)** qRT-PCR analysis for *Npy*, *Pomc*, *Agrp* transcripts in the hypothalamus of *Prdm13*<sup>+/+</sup> and *Prdm13*<sup>-/-</sup> male mice.  $\Delta\Delta Cq$  were calculated relative to control samples using quantification cycle (Cq) threshold values that were normalised to the housekeeping gene, *Gapdh*.

**(B)** *In situ* hybridization experiments on coronal P15 and adult male brain sections to detect the expression of *Prdm13* in the AVPV nucleus of the hypothalamus. High magnification of the squared areas are shown next to each panel. Note the absence of *Prdm13* transcript expression in the AVPV nucleus at both stages ( $\Delta$ ).

**(C)** *In situ* hybridization experiments on sections taken at the level of the AVPV nucleus from *Prdm13*<sup>+/+</sup> and *Prdm13*<sup>-/-</sup> adult male mice for *Kiss1* transcripts. Arrowheads indicate *Kiss1*-positive neurons.

**(D)** Quantification of *Kiss1*-positive neurons in the AVPV nucleus from *Prdm13*<sup>+/+</sup> and *Prdm13*<sup>-/-</sup> adult male mice. No differences in *Kiss1* expression were observed in the mutants compared to wild-types.

**(E)** qRT-PCR analysis for *Kiss1* transcript in the hypothalamus of *Prdm13*<sup>+/+</sup> and *Prdm13*<sup>-/-</sup> female mice.  $\Delta\Delta Cq$  were calculated relative to control samples using Cq threshold values that were normalised to the housekeeping gene, *Gapdh*. Note the non-significantly decreased *Kiss1* levels in mutant mice compared to wild-type.

Scale bars = 500  $\mu$ m (B low magnification), 250  $\mu$ m (B high magnification, C).

AVPV = Anteroventral periventricular nucleus.

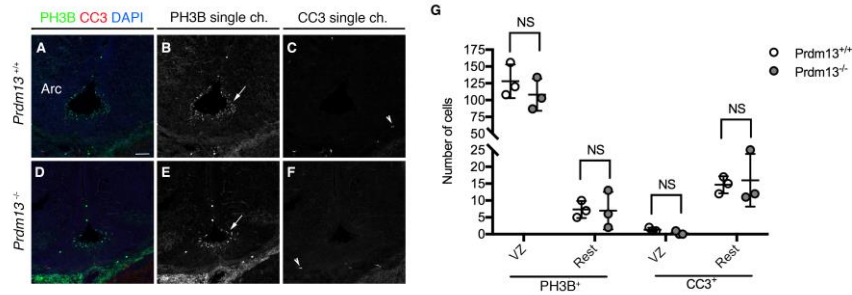

**Supplemental figure 3. Loss of Kiss1 neurons in the developing hypothalamus of *Prdm13*<sup>-/-</sup> mice is not associated with altered cell proliferation or cell death.**

**(A-F)** PH3B (green) and CC3 (red) co-immunostained representative sections from E14.5 embryos of indicated genotypes at the level of the developing Arc nucleus of the hypothalamus. Single channels are shown beside each image (B,C,E,F). Arrows indicate examples of PH3B<sup>+</sup> cells; arrowheads indicate CC3<sup>+</sup> cells.

**(G)** Quantification of proliferating PH3B<sup>+</sup> and apoptotic CC3<sup>+</sup> cells in the VZ and in the rest of the developing hypothalamus. No significant difference in proliferation was noted between wild-types and mutants.

Scale bar = 250μm.

Arc = arcuate nucleus, VZ = ventricular zone.

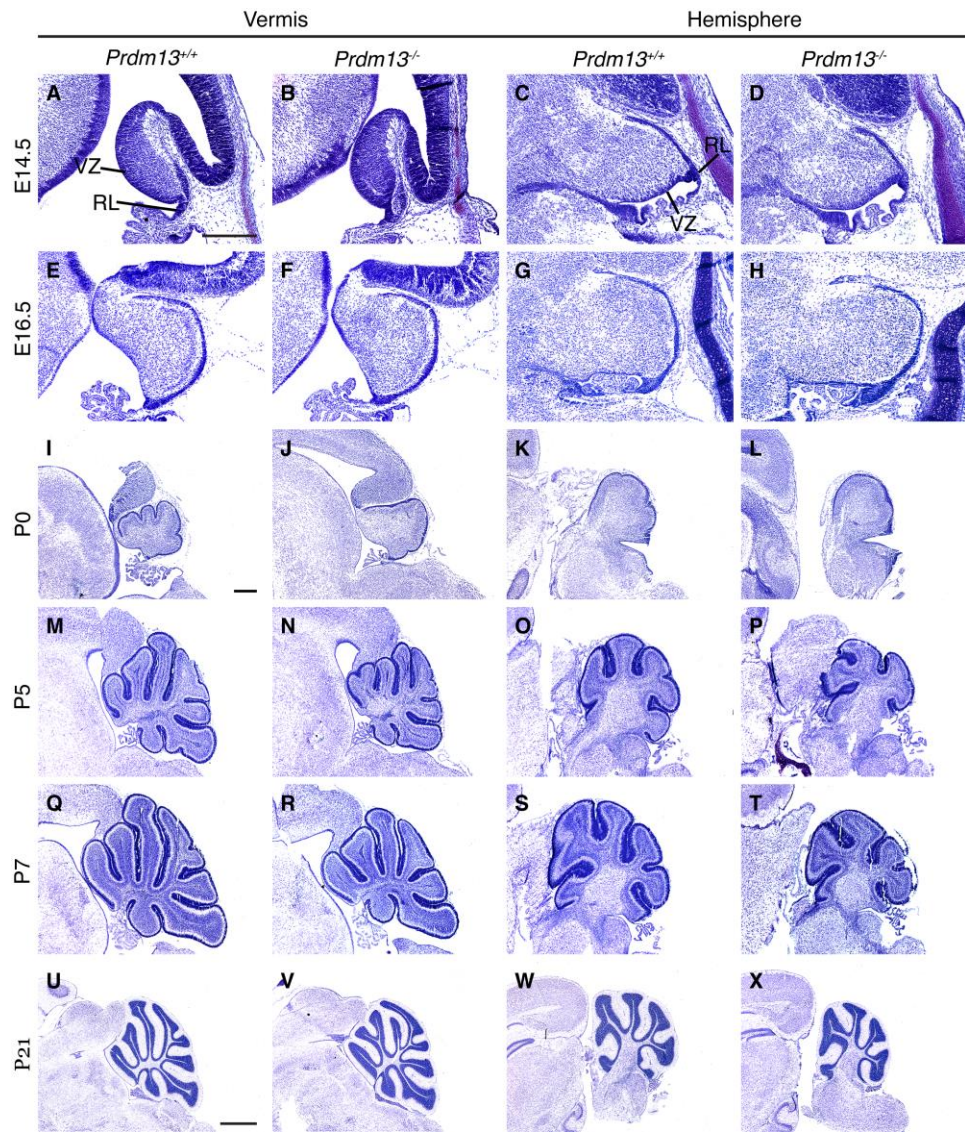

**Supplemental Figure 4. Time course of *Prdm13*<sup>-/-</sup> cerebellar development demonstrating cerebellar hypoplasia at early postnatal stages.** Cresyl violet-stained sagittal sections through the cerebellar vermis and hemisphere of *Prdm13*<sup>+/+</sup> and *Prdm13*<sup>-/-</sup> mice at indicated stages (A-X). Note subtle abnormalities in cerebellar vermis foliation at P0 and overt cerebellar hypoplasia in the vermis by P5 and the hemispheres by P7. Note that images Q, R, W, X are also presented in Figure 5U, V, O, P, respectively. VZ = ventricular zone, RL = rhombic lip. Scale bar = 300 $\mu$ m (A,I), 1mm (U).

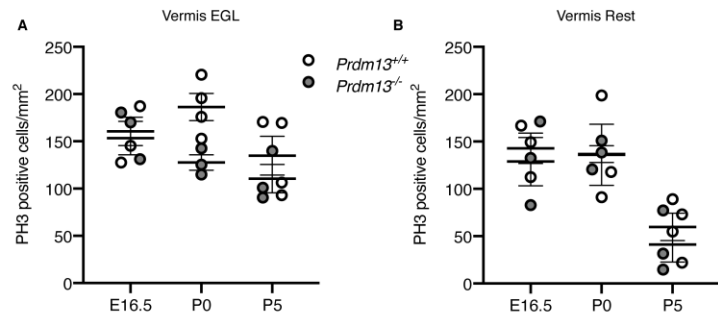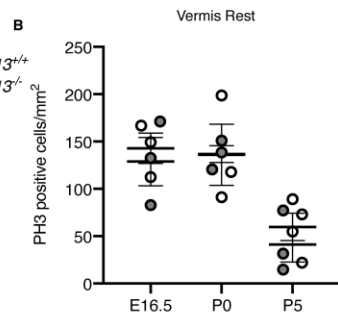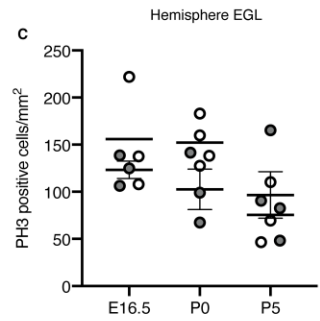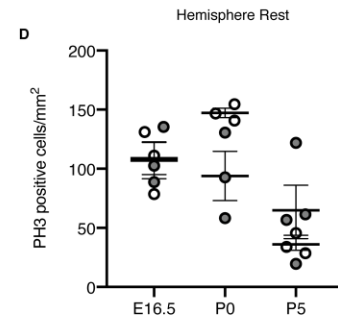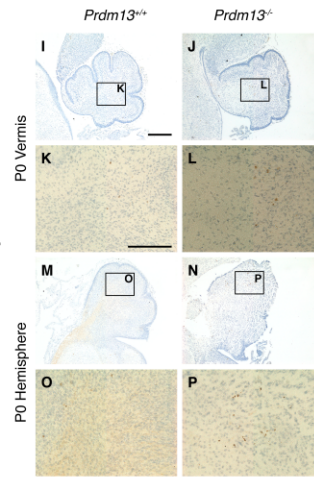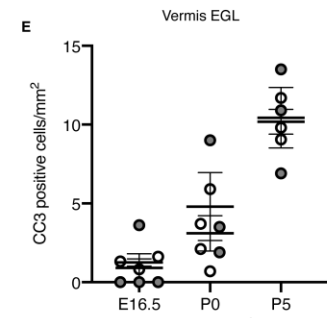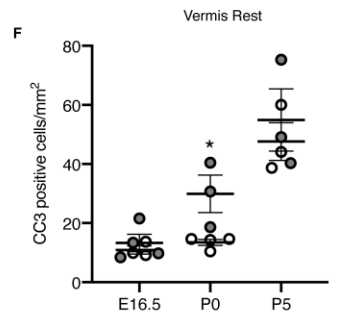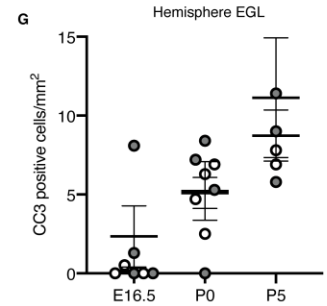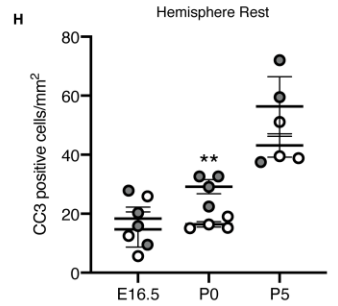



**Supplemental Figure 5. Early postnatal cerebellar hypoplasia is associated with increased apoptosis of non-EGL progenitors. (A-D)** Quantification of phosphohistone 3B (PH3B) positive cells, in the EGL and rest of the cerebellar vermis and hemispheres as determined per mm<sup>2</sup> at stages indicated (n=3 per genotype). No significant difference in proliferation was noted in the vermis or hemispheres at any stage. **(E-H)** Quantification of cleaved caspase 3 (CC3) positive cells, in the EGL and rest of the cerebellar vermis and hemispheres per mm<sup>2</sup> at stages indicated (n=3 per genotype). Note the significant increase in apoptosis at postnatal day 0 (P0) in all but the EGL of *Prdm13* deficient mice (F,H). **(I-P)** Examples of CC3 immunostains, counterstained with haematoxylin, to visualise apoptotic cells on sagittal sections through the cerebellar vermis (I,J) and hemispheres (M,N) at P0, anterior to the left. Magnified views of CC3+ cells in the non- EGL cerebellum at P0 indicated by black boxes in corresponding low power views (K,L,O,P). Note the increase in the number of cells undergoing apoptosis in *Prdm13* deficient cerebella (L,P) \*P<0.05, \*\*P<0.01, Student's *t* test, Scale bar = 300µm (I, K).

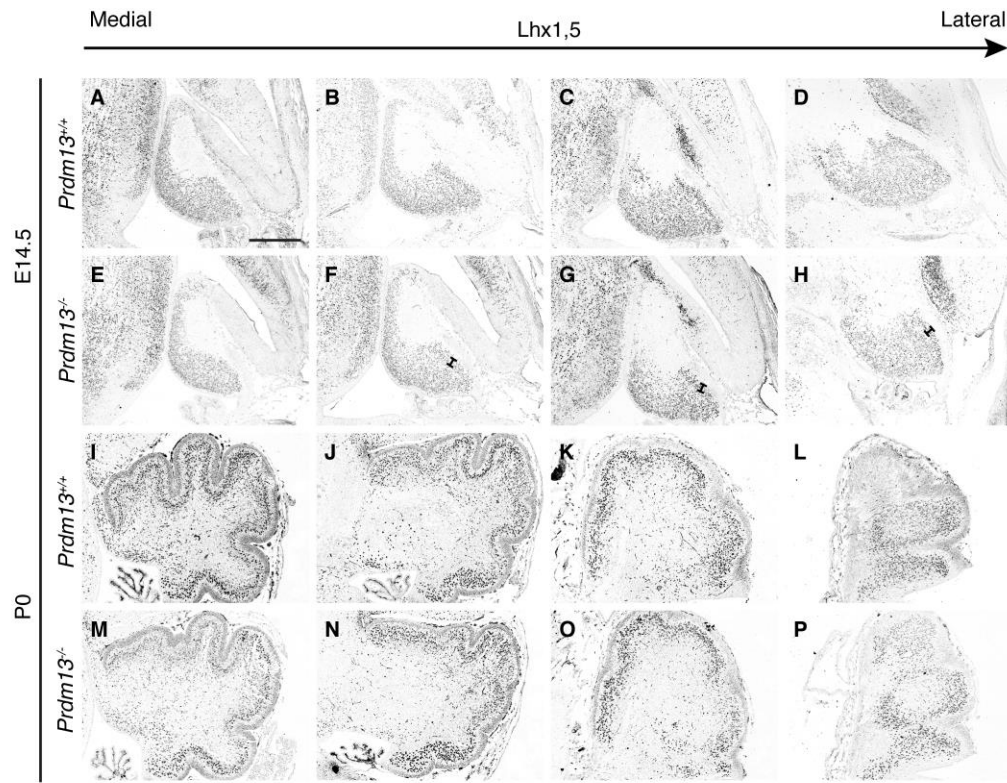

Dapi-PCP2

Dapi-PCP2

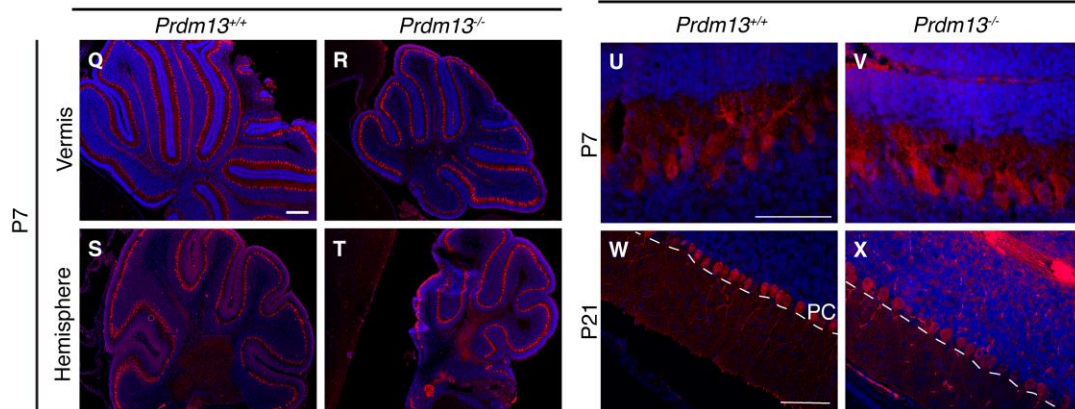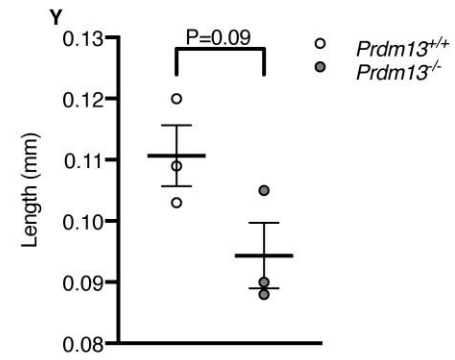

**Supplemental Figure 6. *Prdm13* is not required for PC development.** LHX1,5 immunohistochemistry on sagittal sections through the cerebellar vermis and hemispheres at E14.5 (A-H) and P0 (I-P) to label PC progenitors. (Q-T) PCP2 immunohistochemistry on sagittal sections through the cerebellar vermis and hemispheres at P7 and P21. Note normal PC plate formation in *Prdm13*<sup>-/-</sup> (F-H) cerebella at E14.5, indicated by brackets. Note normal PC distribution at P0 (M-P), normal PC monolayer formation at P7 (R,T) and dendritic arbor at P21 (U-X). (Y) Molecular layer width taken from lobule III/IV to estimate the span of the PC dendritic arbor (n=3 per genotype). Scale bar = 300µm (A, Q), 100µm (U,W). PC = Purkinje cell.

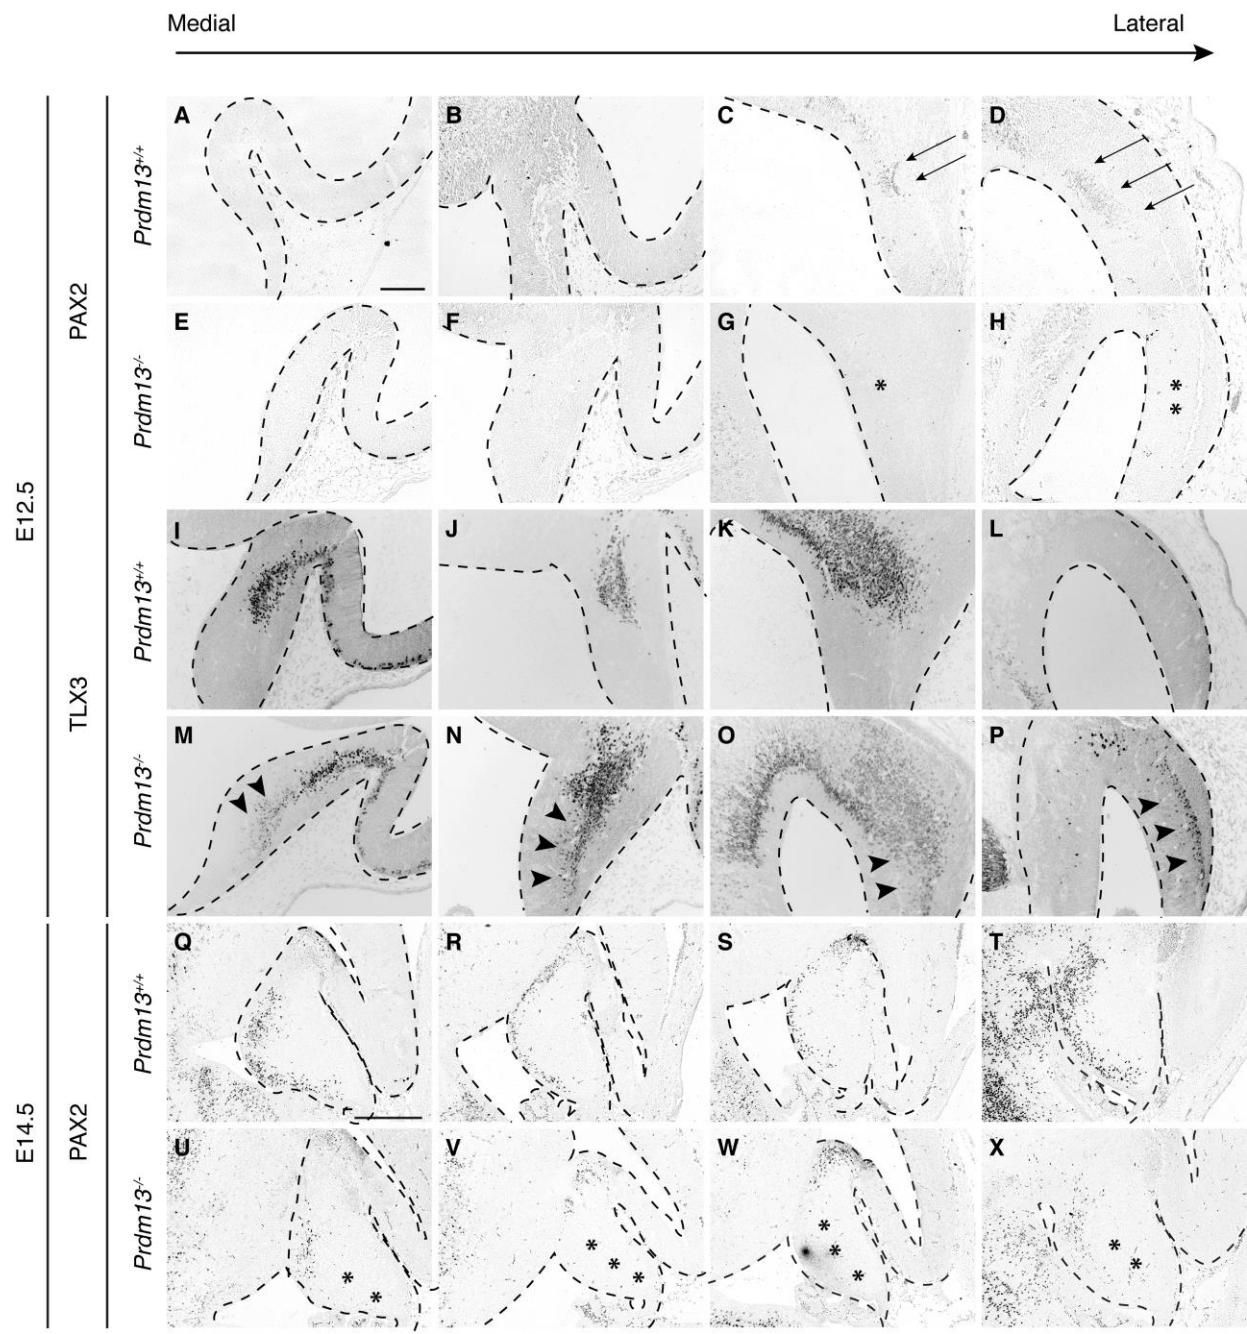

**Supplemental Figure 7. *Prdm13* is required for early GABAergic fate specification.** PAX2 and TLX3 immunostains on sagittal sections through the cerebellum at stages indicated to label GABAergic interneurons and glutamatergic neurons, respectively. (A-P) Note the small cluster of PAX2+ cells in the lateral cerebellum of *Prdm13*<sup>+/+</sup> mice at E12.5, indicated by arrows (C,D), which were absent from *Prdm13*<sup>-/-</sup> cerebella at the same stage, indicated by asterisks (G,H). Note that at E12.5 there is expansion of the TLX3+ population laterally (P) and dorsally (M-P) where these cells occupy the length of the ventro-dorsal cerebellum in *Prdm13*<sup>-/-</sup> mice, indicated by arrowheads (M-P). At E14.5 there is a reduction of PAX2+ neurons in *Prdm13*<sup>-/-</sup> cerebellar vermis, indicated by asterisks (U-X). Scale bar = 300µm (A, Q).

### Supplemental Acknowledgments

We would like to thank GOSgene for organising the exome sequencing and for analysing the subsequent data on Pedigree 1. GOSgene members are as follows: Hywel J. Williams, Polona Le Quesne-Stabej, Louise A. Ocaka, Lamia Boukhibar, Jasmine Gratton, Andrey Gagunashvili, Rojeen Niazi, Georg Otto, Daniel Kelberman, Rosalind Davies, Philip Beales, Chiara Bacchelli, Chela James and Nital Jani. Please note that only the names that are also listed as co-authors in this manuscript directly worked on this project.
